# Supplementary material for: Variational regional inverse modeling of reactive species emissions with PYVAR-CHIMERE
Source: Copernicus journal article supplement (doi:10.5194/gmd-2019-186), 2019-09-04
Supplement: Supplementary file [file gmd-2019-186-AC3-supplement.pdf]

Short comment #1

Received and published: 5 November 2019

**We wish to thank the editor for her remark. Our answer is in bold hereafter.**

Dear authors, in my role as Executive editor of GMD, I would like to bring to your attention our Editorial version 1.2:

<https://www.geosci-model-dev.net/12/2215/2019/>

This highlights some requirements of papers published in GMD, which is also available on the GMD website in the 'Manuscript Types' section:

[http://www.geoscientific-model-development.net/submission/manuscript\\_types.html](http://www.geoscientific-model-development.net/submission/manuscript_types.html)C1

In particular, please note that for your paper, the following requirements have not been met in the Discussions paper:

- The main paper must give the model name and version number (or other unique identifier) in the title. Therefore please provide the version number of the PYVAR-CHIMERE which is actually used for the current publication in the title in your revised submission to GMD.

Yours, Astrid Kerkweg

**We now provide a version number of PYVAR-CHIMERE in the title: "Variational regional inverse modeling of reactive species emissions with PYVAR-CHIMERE-v2019".**
